# Supplementary material for: Housing and health: new evidence using biomarker data
Source: J Epidemiol Community Health. 2019 Jan 14;73(3):256–62. doi: 10.1136/jech-2018-211431 (PMC6580751; doi:10.1136/jech-2018-211431)
Supplement: Supplementary data [file jech-2018-211431supp002.pdf]

Appendix Table 1: Robustness check models

|                                                  | 1. Original        | 2. Exc. Med        | 3. Wave            | 4. Month           |
|--------------------------------------------------|--------------------|--------------------|--------------------|--------------------|
| <b>Housing tenure (ref. Owned with mortgage)</b> |                    |                    |                    |                    |
| Owned outright                                   | 0.02<br>(0.03)     | 0.03<br>(0.04)     | 0.02<br>(0.03)     | 0.02<br>(0.03)     |
| Social rent                                      | 0.08<br>(0.05)     | 0.05<br>(0.05)     | 0.07<br>(0.05)     | 0.08<br>(0.05)     |
| Private rent                                     | 0.10*<br>(0.05)    | 0.11*<br>(0.05)    | 0.10*<br>(0.05)    | 0.10*<br>(0.05)    |
| <b>Housing payment burden (yes)</b>              | -0.14*<br>(0.07)   | -0.17*<br>(0.08)   | -0.14*<br>(0.07)   | -0.14*<br>(0.07)   |
| <b>Housing payment difficulties (yes)</b>        | 0.00<br>(0.05)     | 0.03<br>(0.06)     | -0.00<br>(0.05)    | -0.00<br>(0.05)    |
| <b>Housing benefit (yes)</b>                     | -0.05<br>(0.05)    | -0.02<br>(0.06)    | -0.05<br>(0.05)    | -0.05<br>(0.05)    |
| <b>Central heating (no)</b>                      | 0.04<br>(0.05)     | 0.04<br>(0.05)     | 0.04<br>(0.05)     | 0.04<br>(0.05)     |
| <b>Warm enough (no)</b>                          | -0.04<br>(0.06)    | -0.04<br>(0.07)    | -0.04<br>(0.06)    | -0.04<br>(0.06)    |
| <b>Overcrowding (yes)</b>                        | 0.00<br>(0.05)     | -0.01<br>(0.05)    | 0.00<br>(0.05)     | 0.01<br>(0.05)     |
| <b>Dwelling type (ref. Detached)</b>             |                    |                    |                    |                    |
| Semi detached                                    | 0.07*<br>(0.03)    | 0.07*<br>(0.03)    | 0.07*<br>(0.03)    | 0.06*<br>(0.03)    |
| Terrace                                          | 0.13***<br>(0.03)  | 0.15***<br>(0.04)  | 0.13***<br>(0.03)  | 0.13***<br>(0.03)  |
| Flat                                             | 0.18***<br>(0.05)  | 0.17**<br>(0.05)   | 0.18***<br>(0.05)  | 0.18***<br>(0.05)  |
| Other                                            | 0.16<br>(0.17)     | 0.23<br>(0.23)     | 0.17<br>(0.17)     | 0.17<br>(0.17)     |
| <b>Prefer to stay</b>                            | 0.05*<br>(0.03)    | 0.04<br>(0.03)     | 0.05*<br>(0.03)    | 0.05*<br>(0.03)    |
| <b>Expect to move</b>                            | -0.06<br>(0.05)    | -0.07<br>(0.06)    | -0.06<br>(0.05)    | -0.06<br>(0.05)    |
| <b>Prefer to stay x expect to move</b>           | 0.15<br>(0.10)     | 0.21<br>(0.11)     | 0.15<br>(0.10)     | 0.14<br>(0.10)     |
| Constant                                         | -1.12***<br>(0.09) | -1.17***<br>(0.10) | -1.12***<br>(0.09) | -1.15***<br>(0.10) |
| Observations                                     | 9,974              | 7,814              | 9,974              | 9,974              |
| R-squared                                        | 0.20               | 0.22               | 0.20               | 0.20               |

Notes: All models include the following controls: demographic and socio-economic position controls – age, gender, cohabitation, ethnicity, region, employment status, highest educational qualification, income quartile (age standardised), subjective financial situation. Health and health behaviour controls – smoking status, body mass index (categorised), longstanding illness or disability..

Column 2 excludes all respondents taking statins or anti-inflammatories. Column 3 includes the wave in which the biomarker data was collected in addition to the above variables. Column 4 includes the month of biomarker collection in addition to the above variables.

Appendix Table 2: Robustness check models

|                                      | 1. Original        | 2. Noise           | 3. Noise x Housing type |
|--------------------------------------|--------------------|--------------------|-------------------------|
| <b>Dwelling type (ref. Detached)</b> |                    |                    |                         |
| Semi detached                        | 0.06*<br>(0.03)    | 0.07*<br>(0.03)    | 0.06*<br>(0.03)         |
| Terrace                              | 0.13***<br>(0.03)  | 0.15***<br>(0.03)  | 0.14***<br>(0.03)       |
| Flat                                 | 0.18***<br>(0.04)  | 0.20***<br>(0.04)  | 0.22***<br>(0.05)       |
| Other                                | 0.17<br>(0.17)     | 0.18<br>(0.17)     | 0.21<br>(0.21)          |
| <b>Noise (yes)</b>                   | -                  | -0.09**<br>(0.03)  | -0.13<br>(0.07)         |
| <b>Noise x semi detached</b>         | -                  | -                  | 0.08<br>(0.09)          |
| <b>Noise x terrace</b>               | -                  | -                  | 0.03<br>(0.09)          |
| <b>Noise x flat</b>                  | -                  | -                  | -0.02<br>(0.10)         |
| <b>Noise x other</b>                 | -                  | -                  | -0.11<br>(0.27)         |
| Constant                             | -1.09***<br>(0.09) | -1.07***<br>(0.09) | -1.06***<br>(0.09)      |
| Observations                         | 9,974              | 9,974              | 9,974                   |
| R-squared                            | 0.20               | 0.20               | 0.20                    |

Notes: All models include the following controls: demographic and socio-economic position controls – age, gender, cohabitation, ethnicity, region, employment status, highest educational qualification, income quartile (age standardised), subjective financial situation. Health and health behaviour controls – smoking status, body mass index (categorised), longstanding illness or disability.

Appendix Table 3: Full models with and without BMI and Smoking indicators

|                                                  | 1. Original        | 2. Without BMI and Smoking |
|--------------------------------------------------|--------------------|----------------------------|
| <b>Housing tenure (ref. Owned with mortgage)</b> |                    |                            |
| Owned outright                                   | 0.02<br>(0.03)     | -0.01<br>(0.04)            |
| Social rent                                      | 0.08<br>(0.05)     | 0.14**<br>(0.05)           |
| Private rent                                     | 0.10*<br>(0.05)    | 0.12*<br>(0.05)            |
| <b>Housing payment burden (yes)</b>              | -0.14*<br>(0.07)   | -0.18*<br>(0.07)           |
| <b>Housing payment difficulties (yes)</b>        | 0.00<br>(0.05)     | 0.03<br>(0.06)             |
| <b>Housing benefit (yes)</b>                     | -0.05<br>(0.05)    | -0.02<br>(0.05)            |
| <b>Central heating (no)</b>                      | 0.04<br>(0.05)     | 0.02<br>(0.05)             |
| <b>Warm enough (no)</b>                          | -0.04<br>(0.06)    | -0.01<br>(0.06)            |
| <b>Overcrowding (yes)</b>                        | 0.00<br>(0.05)     | 0.03<br>(0.06)             |
| <b>Dwelling type (ref. Detached)</b>             |                    |                            |
| Semi detached                                    | 0.07*<br>(0.03)    | 0.10***<br>(0.03)          |
| Terrace                                          | 0.13***<br>(0.03)  | 0.16***<br>(0.03)          |
| Flat                                             | 0.18***<br>(0.05)  | 0.16***<br>(0.05)          |
| Other                                            | 0.16<br>(0.17)     | 0.19<br>(0.17)             |
| <b>Prefer to stay</b>                            | 0.05*<br>(0.03)    | 0.04<br>(0.03)             |
| <b>Expect to move</b>                            | -0.06<br>(0.05)    | -0.11<br>(0.06)            |
| <b>Prefer to stay x expect to move</b>           | 0.15<br>(0.10)     | 0.14<br>(0.11)             |
| Constant                                         | -1.12***<br>(0.09) | -0.79***<br>(0.10)         |
| Observations                                     | 9,974              | 9,974                      |
| R-squared                                        | 0.20               | 0.07                       |

Notes: Column 1 is Model 4 from Table 3, Column 2 reports the same analysis excluding BMI and smoking status.
